# Supplementary material for: Association between Timing of Colonization and Risk of Developing Klebsiella pneumoniae Carbapenemase-Producing K. pneumoniae Infection in Hospitalized Patients
Source: PubMed Central journal article supplement (PMC9045231; doi:10.1128/spectrum.01970-21), 2022-03-24
Supplement: spectrum01970-21_supp_1_seq6.pdf [file spectrum01970-21_supp_1_seq6.pdf]

**Supplementary Table 1. Variables related with the screening protocol**

| Variable                                                                                                                         |                  |
|----------------------------------------------------------------------------------------------------------------------------------|------------------|
| Distribution of swabs per patient, median (IQR).                                                                                 | 5.00 (3.00-7.00) |
| Distribution of time (days)-from-hospitalization to first swabbing, median (IQR).                                                | 2.00 (1.00-6.00) |
| Distribution of number of negative swabs before a positive swab in the patients who become colonized on follow-up, median (IQR). | 2.00 (1.00-2.00) |

**Supplementary Table 2. Distribution of infection types in the two colonization groups.**

| Type of KPC-Kp infection | Colonized at start of follow-up<br>(n=47) | Colonized during follow-up<br>(n=31) |
|--------------------------|-------------------------------------------|--------------------------------------|
| Bacteraemia              | 18 (38,3)                                 | 13 (42,0)                            |
| Pneumonia                | 11 (23,4)                                 | 8 (25,8)                             |
| Urinary tract infection  | 10 (21,2)                                 | 2 (6,4)                              |
| Abdominal                | 3 (6,4)                                   | 5 (16,1)                             |
| Others                   | 5 (10,6)                                  | 3 (9,7)                              |

Data presented as number of patients (percentage). Chi-squared test p=0.34

**Supplementary Figure S1. CART analysis dichotomizing the variable time to colonization and risk of KPC-Kp infection.**

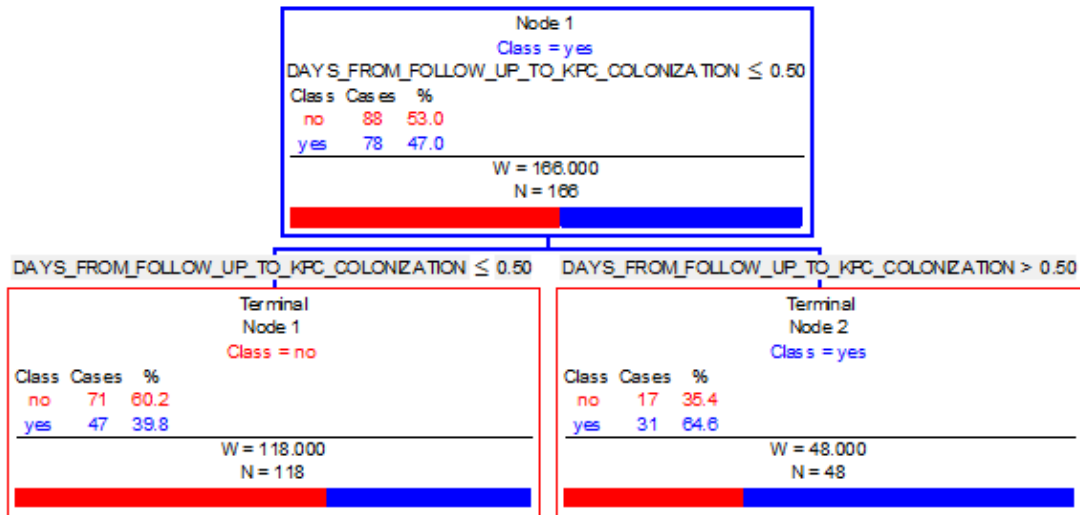

The CART analysis categorizes the continuous variable time to colonization (in days) into a two-category variable: patients who were colonized at day 0 (colonized at start of follow-up) and patients colonized during follow-up (time from the first negative swab to the first rectal swab positive for KPC-Kp > 0 days).

**No = No KPC-Kp infection**

**Yes = KPC-Kp infection**

**Supplementary Figure S2. KPC-Kp infection risk classification by hospital ward using TreeNet (high vs. low risk).**

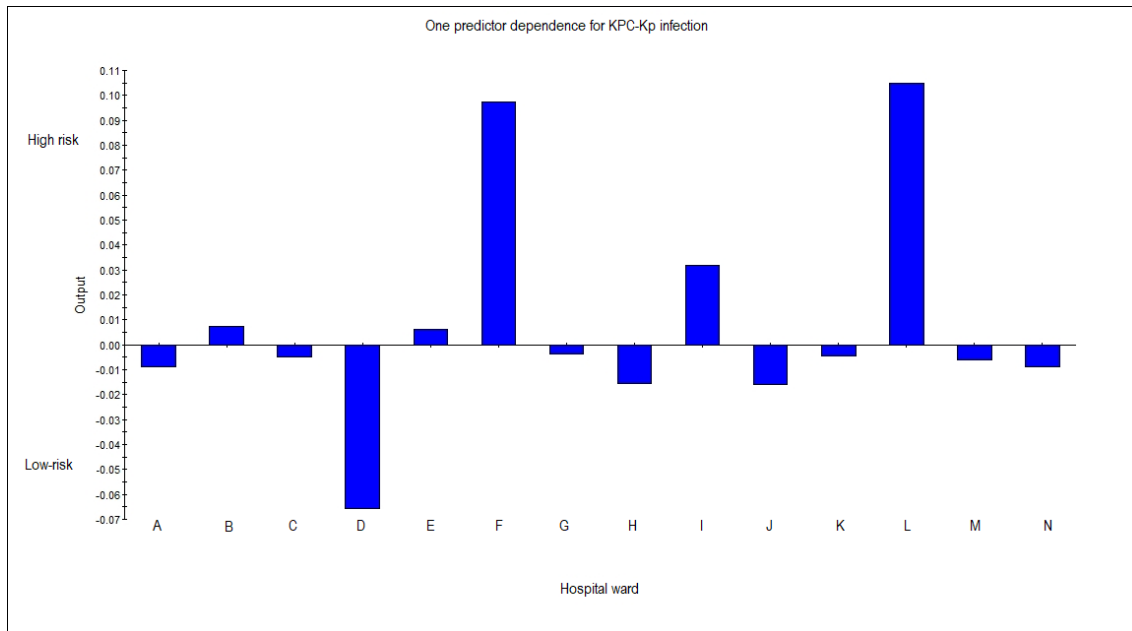

**Supplementary Figure S3. CART analysis to categorize risk of KPC-Kp infection in different patient follow-up periods.**

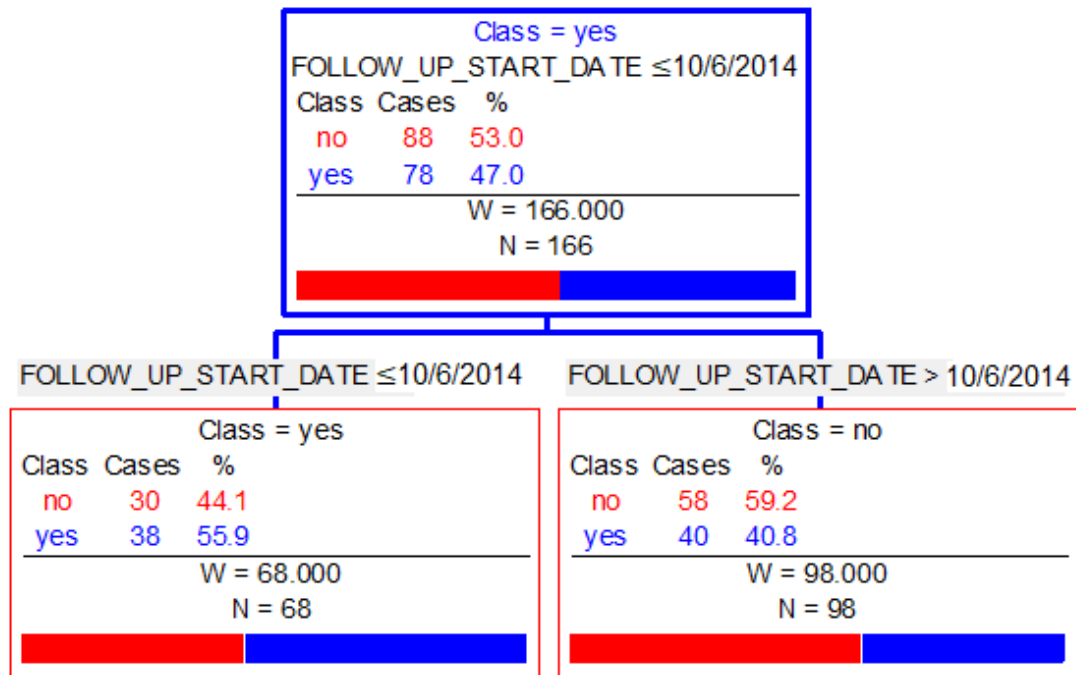

**No = No KPC-Kp infection**

**Yes = KPC-Kp infection**
